# Supplementary material
Source: Springer Nature journal article supplement (https://www.springermedizin.de/resource/supplementary/12957_2012_1230_MOESM12_ESM.pdf/9562002)

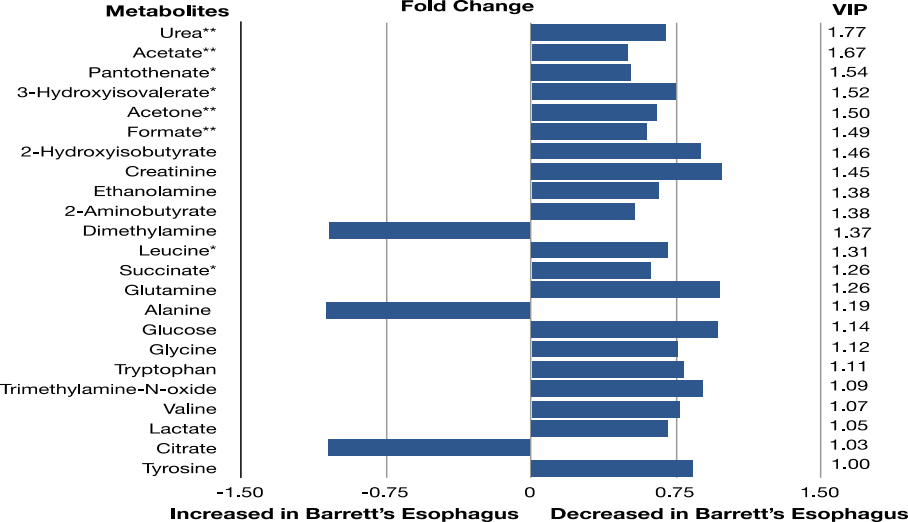

Supplement: MOESM12 [file 9562002]
